# Supplementary material for: Emotion Recognition, Empathy, or ToM? The Influence of Social Cognition on Communication in Traumatic Brain Injury
Source: Atypon-hosted journal article supplement (doi:10.1024/1016-264x/a000355), 2022-05-23
Supplement: 1016-264x_a000355_esm1.pdf [file 1016-264x_a000355_esm1.pdf]

# Electronic Supplementary Material

## ESM 1. Example query syntax PsycInfo

| Number | Query                                                                                     | Results |
|--------|-------------------------------------------------------------------------------------------|---------|
| S26    | (S24 AND S25)                                                                             | 180     |
| S25    | (S04 AND S11)                                                                             | 1,889   |
| S24    | (S12 OR S13 OR S14 OR S15 OR S16 OR S17 OR S18 OR S19 OR S20 OR S22 OR S23)               | 240,857 |
| S23    | TI "cognitive language" OR AB "cognitive language" OR KW "cognitive language"             | 638     |
| S22    | TI "cognitive linguistic*" OR AB "cognitive linguistic*" OR KW "cognitive linguistic*"    | 1,542   |
| S21    | TI discours* OR AB discours* OR KW discours*                                              | 56,599  |
| S20    | TI "social communicat*" OR AB "social communicat*" OR KW "social communicat*"             | 4,590   |
| S19    | TI "complex language" OR AB "complex language" OR KW "complex language"                   | 325     |
| S18    | TI "high* order language" OR AB "high* order language" OR KW "high* order language"       | 72      |
| S17    | TI "high* level language" OR AB "high* level language" OR KW "high* level language"       | 178     |
| S16    | TI "subtle communicat*" OR AB "subtle communicat*" OR KW "subtle communicat*"             | 38      |
| S15    | TI "subtle language" OR AB "subtle language" OR KW "subtle language"                      | 58      |
| S14    | TI pragmatic* OR AB pragmatic* OR KW pragmatic*                                           | 18,513  |
| S13    | TI "cognitive communicat*" OR AB "cognitive communicat*" OR KW "cognitive communicat*"    | 434     |
| S12    | TI communicat* OR AB communicat* OR KW communicat*                                        | 223,417 |
| S11    | (S05 OR S06 OR S07 OR S08 OR S09 OR S10)                                                  | 386,495 |
| S10    | TI "social percept*" OR AB "social percept*" OR KW "social percept*"                      | 4,538   |
| S09    | TI emoti* OR AB emoti* OR KW emoti*                                                       | 335,071 |
| S08    | TI empath* OR AB empath* OR KW empath*                                                    | 32,746  |
| S07    | TI TOM OR AB TOM OR KW TOM                                                                | 3,864   |
| S06    | TI "theory of mind" OR AB "theory of mind" OR KW "theory of mind"                         | 8,701   |
| S05    | TI "social cognit*" OR AB "social cognit*" OR KW "social cognit*"                         | 23,329  |
| S04    | (S01 OR S02 OR S03)                                                                       | 20,112  |
| S03    | TI "closed head injur*" OR AB "closed head injur*" OR KW "closed head injur*"             | 1,415   |
| S02    | TI TBI OR AB TBI OR KW TBI                                                                | 11,547  |
| S01    | TI "traumatic brain injur*" OR AB "traumatic brain injur*" OR KW "traumatic brain injur*" | 18,649  |
