# Supplementary material for: Emotion Recognition, Empathy, or ToM? The Influence of Social Cognition on Communication in Traumatic Brain Injury
Source: Atypon-hosted journal article supplement (doi:10.1024/1016-264x/a000355), 2022-05-23
Supplement: 1016-264X_a000355_esm2.pdf [file 1016-264X_a000355_esm2.pdf]

## Electronic Supplementary Material

### ESM 2. Study quality scores obtained for the appraisal tool for cross-sectional studies (AXIS)

| Item No | Question                                                                                                                                              | Yes                               | No | Unclear | Not Applicable |
|---------|-------------------------------------------------------------------------------------------------------------------------------------------------------|-----------------------------------|----|---------|----------------|
| 1       | Were the aims/objectives of the study clear?                                                                                                          | 17                                | 0  | 0       | 0              |
| 2       | Was the study design appropriate for the stated aim(s)?                                                                                               | 17                                | 0  | 0       | 0              |
| 3       | Was the sample size justified?                                                                                                                        | 0                                 | 17 | 0       | 0              |
| 4       | Was the target/reference population clearly defined? (Is it clear who the research was about?)                                                        | 16                                | 1  | 0       | 0              |
| 5       | Was the sample frame taken from an appropriate population base so that it closely represented the target/reference population under investigation?    | 0                                 | 0  | 17      | 0              |
| 6       | Was the selection process likely to select subjects/participants who were representative of the target/reference population under investigation?      | 0                                 | 0  | 17      | 0              |
| 7       | Were measures undertaken to address and categorize nonresponders?                                                                                     | 1                                 | 16 | 0       | 0              |
| 8       | Were the risk factor and outcome variables measured appropriate to the aims of the study?                                                             | 17                                | 0  | 0       | 0              |
| 9       | Were the risk factor and outcome variables measured correctly using instruments/measurements that had been trialed, piloted, or published previously? | 10 <sup>a</sup><br>7 <sup>b</sup> | 0  | 0       | 0              |
| 10      | Is it clear what was used to determine statistical significance and/or precision estimates? (e.g., <i>p</i> -values, confidence intervals)            | 6                                 | 11 | 0       | 0              |
| 11      | Were the methods (including statistical methods) sufficiently described to enable them to be repeated?                                                | 17                                | 1  | 0       | 0              |
| 12      | Were the basic data adequately described?                                                                                                             | 17                                | 0  | 0       | 0              |
| 13      | Does the response rate raise concerns about nonresponse bias?                                                                                         | 0                                 | 1  | 0       | 16             |
| 14      | If appropriate, was information about nonresponders described?                                                                                        | 1                                 | 0  | 0       | 16             |
| 15      | Were the results internally consistent?                                                                                                               | 16                                | 0  | 1       | 0              |
| 16      | Were the results presented for all the analyses described in the methods?                                                                             | 17                                | 0  | 0       | 0              |
| 17      | Were the authors' discussions and conclusions justified by the results?                                                                               | 17                                | 0  | 0       | 0              |
| 18      | Were the limitations of the study discussed?                                                                                                          | 14                                | 3  | 0       | 0              |
| 19      | Were there any funding sources or conflicts of interest that may affect the authors' interpretation of the results?                                   | 0                                 | 10 | 7       | 0              |
| 20      | Was ethical approval or consent of participants obtained?                                                                                             | 14                                | 0  | 3       | 0              |

Note. <sup>a</sup>all measures, <sup>b</sup>all measures excl. experimental paradigm.
