# Supplementary material for: Emotion Recognition, Empathy, or ToM? The Influence of Social Cognition on Communication in Traumatic Brain Injury
Source: Atypon-hosted journal article supplement (doi:10.1024/1016-264x/a000355), 2022-05-23
Supplement: 1016-264X_a000355_esm3.pdf [file 1016-264X_a000355_esm3.pdf]

# Electronic Supplementary Material

## ESM 3. Study characteristics

| Study (year)                      | Cohort<br>N (male) |            | Age<br>M (SD)                |                              | Time<br>postonset<br>(months)<br>M (SD)      | TBI severity                     | Subcomponent social cognition<br>measure                                                                                                                                                         | Subcomponent communica-<br>tion measure                                                                                                           | Statistically significant relationship<br>(yes: +/no: -)                                                                                                                                                   |
|-----------------------------------|--------------------|------------|------------------------------|------------------------------|----------------------------------------------|----------------------------------|--------------------------------------------------------------------------------------------------------------------------------------------------------------------------------------------------|---------------------------------------------------------------------------------------------------------------------------------------------------|------------------------------------------------------------------------------------------------------------------------------------------------------------------------------------------------------------|
|                                   | EG                 | CG         | EG                           | CG                           |                                              |                                  |                                                                                                                                                                                                  |                                                                                                                                                   |                                                                                                                                                                                                            |
| Bosco et al. (2017)               | 30<br>(23)         | 30<br>(23) | 37.13<br>(11.36)             | 37.03<br>(11.45)             | 60.01<br>(64.21)                             | Moderate – severe<br>(GCS: 5-9)  | <i>First-order ToM</i><br>Smarties Task<br>(Perner et al., 1989),<br>Sally-Anne Task<br>(Baron-Cohen et al., 1985)<br><i>Second-Order ToM</i><br>Selection of 6 Strange Stories<br>(Happé, 1994) | <i>Pragmatics (indirect speech acts)</i><br>Assessment Battery of Com-<br>munication (ABaCo; Angeleri<br>et al., 2012)                            | ra +<br>ToM contributed significantly to lin-<br>guistic comprehension, linguistic pro-<br>duction, extralinguistic production                                                                             |
| Bosco et al. (2018)               | 35<br>(29)         | 35<br>(29) | 37.51<br>(12.25)             | 37.26<br>(11.58)             | 63.57<br>(74.34)                             | Moderate – severe<br>(GCS: 3-13) | <i>First-order ToM</i><br>Smarties Task<br>(Perner et al., 1989);<br>Sally-Anne Task<br>(Baron-Cohen et al., 1985)<br><i>Second-Order ToM</i><br>selection of 6 Strange Stories<br>(Happé, 1994) | <i>Pragmatics (indirect speech acts; sincere, deceit, irony)</i><br>Assessment Battery of Com-<br>munication<br>(ABaCo; Angeleri et al.,<br>2012) | ra +<br>ToM contributed significantly to lin-<br>guistic comprehension of deceit, ex-<br>tralinguistic comprehension of deceit,<br>extralinguistic production of deceit,<br>linguistic production of irony |
| Byom & Turkstra (2012)            | 5<br>(5)           | 5<br>(5)   | 44.58<br>(n.a.)              | 42.24<br>(n.a.)              | n.a.                                         | Severe                           | <i>ToM (exp.)</i><br>Manipulated version of RCIT<br>→ analysis of Mental State<br>Terms (MST)                                                                                                    | <i>Discourse production (exp.)</i><br>Relationship Closeness In-<br>duction Task (RCIT; Sedi-<br>kides, Campbell et al., 1998)                    | Wilcoxon signed rank test +<br>significant different pattern of mental<br>state word use across conversation<br>settings                                                                                   |
| Byom & Turkstra (2017)            | 21<br>(12)         | 23<br>(12) | Mdn: 33<br>(range:<br>21-59) | Mdn: 28<br>(range:<br>21-57) | Mdn 8<br>years<br>(range: 1.4<br>– 40 years) | Moderate – severe<br>(GCS < 13)  | <i>ToM (exp.)</i><br>Manipulated version of dis-<br>course task (view of a fictional<br>character holding the opposite<br>opinion)                                                               | <i>Discourse production (exp.)</i><br>production of MST in<br>discussion of controversial<br>topics (e.g., animal testing)                        | ca +<br>Significant correlation between fre-<br>quency of mental state words and so-<br>cial acceptability rating                                                                                          |
| Channon, Pellijeff, & Rule (2005) | 19<br>(15)         | 19<br>(13) | 54.74<br>(rechnen)           | n.a.                         | 9.68 years<br>(9.10)                         | Severe<br>(PTA > 1<br>day)       | <i>ToM (exp.)</i><br>Action Comprehension Task                                                                                                                                                   | <i>Pragmatics (sarcasm) (exp.)</i><br>Sarcasm Comprehension<br>Task                                                                               | ca +<br>significant correlation between sar-<br>casm comprehension and mentalistic<br>action comprehension                                                                                                 |

## Electronic Supplementary Material

| Study (year)                            | Cohort<br>N (male) |         | Age<br>M (SD) |             | Time<br>postonset<br>(months)<br>M (SD) | TBI severity                         | Subcomponent social cognition<br>measure                                                                                                                             | Subcomponent communica-<br>tion measure                                                                                                                                                                                                                                           | Statistically significant relationship<br>(yes: +/no: -)                                                                                            |
|-----------------------------------------|--------------------|---------|---------------|-------------|-----------------------------------------|--------------------------------------|----------------------------------------------------------------------------------------------------------------------------------------------------------------------|-----------------------------------------------------------------------------------------------------------------------------------------------------------------------------------------------------------------------------------------------------------------------------------|-----------------------------------------------------------------------------------------------------------------------------------------------------|
|                                         | EG                 | CG      | EG            | CG          |                                         |                                      |                                                                                                                                                                      |                                                                                                                                                                                                                                                                                   |                                                                                                                                                     |
| Honan et al. (2015)                     | 25 (18)            | 25 (18) | 47.52         | 48.52       | 14.1 (8.85)                             | Severe (PTA > 1 day)                 | <i>ToM</i><br>TASIT (McDonald et al., 2003);<br>Reading The Mind in The Eyes<br>Test (Baron-Cohen et al., 2001);<br>High-ToM-Condition of dis-<br>course task (exp.) | <i>Discourse Comprehension</i><br>(exp.)<br>Comprehension of everyday<br>conversation                                                                                                                                                                                             | ra -<br>No significant difference between TBI<br>group and controls on high-ToM task<br>when controlling for WM abilities                           |
| Martin & McDonald (2005)                | 16 (12)            | 16 (10) | 39.43         | 38.74       | 7.40 years (4.90)                       | Severe                               | <i>ToM (exp.)</i><br>Mental Inference Stories (Exp.,<br>Bibby & McDonald, 2005)                                                                                      | <i>Pragmatics (irony) (exp.)</i><br>Pragmatic Interpretation<br>Stories (adapted from Win-<br>ner et al., 1998)                                                                                                                                                                   | ca -<br>No correlation between ToM and<br>irony comprehension                                                                                       |
| McDonald & Flanagan (2004)              | 34 (25)            | 34 (22) | 41 (12)       | 36 (13)     | 9 years (8)                             | Severe (PTA > 1 day)                 | <i>ToM, emotion recognition</i><br>TASIT (McDonald et al., 2003)                                                                                                     | <i>Pragmatics (sarcasm)</i><br>TASIT (McDonald et al., 2003)                                                                                                                                                                                                                      | ca -/+<br>No correlation between first-order<br>ToM and emotion recognition and<br>sarcasm; a correlation between sec-<br>ond-order ToM and sarcasm |
| McDonald et al. (2004)                  | 21 (15)            | 21 (14) | 39 (12)       | 38 (15.7)   | 9 years (9)                             | Severe (PTA M 94 days)               | <i>ToM, emotion recognition</i><br>TASIT (McDonald et al., 2003)                                                                                                     | <i>Global communication</i><br>rating of spontaneous con-<br>versation with a known per-<br>son with Behaviourally Ref-<br>erenced Rating System of In-<br>termediate Social Skills—Re-<br>vised (BRISS-R; Wallander et<br>al., 1985) (subscale Personal<br>Conversational Style) | ca +<br>Significant correlation of ToM with<br>global communication abilities rated<br>by an independent rater                                      |
| McDonald, Gowland, Randall, Fisher, Os- | 25 (18)            | 28 (19) | 48.2 (12.0)   | 49.0 (12.2) | 13.6 years (9.0)                        | Moderate - severe (PTA M: 69.2 days) | <i>ToM, emotion recognition</i><br>TASIT (McDonald et al., 2003)<br>Reading The Mind in The Eyes<br>Test (Baron-Cohen et al., 2001)<br>High-ToM-Condition (Exp.)     | <i>Discourse production (exp.)</i><br>naturalistic speech produc-<br>tion; analysis of the number<br>and adequacy of correct de-<br>tails in photograph descrip-<br>tion and association tasks                                                                                    | ra -/+<br>Significant influence of ToM only on<br>discourse production tasks with high<br>demand on inhibitory control                              |

## Electronic Supplementary Material

| Study (year)                               | Cohort   |         | Age           |               | Time postonset (months) | TBI severity                    | Subcomponent social cognition measure                                                                                                                                                                                        | Subcomponent communication measure                                                                                     | Statistically significant relationship (yes: +/no: -)                                                                                                         |
|--------------------------------------------|----------|---------|---------------|---------------|-------------------------|---------------------------------|------------------------------------------------------------------------------------------------------------------------------------------------------------------------------------------------------------------------------|------------------------------------------------------------------------------------------------------------------------|---------------------------------------------------------------------------------------------------------------------------------------------------------------|
|                                            | N (male) |         | M (SD)        |               |                         |                                 |                                                                                                                                                                                                                              |                                                                                                                        |                                                                                                                                                               |
|                                            | EG       | CG      | EG            | CG            |                         |                                 |                                                                                                                                                                                                                              |                                                                                                                        |                                                                                                                                                               |
| borne-Crowley, & Honan (2014)              |          |         |               |               |                         |                                 |                                                                                                                                                                                                                              |                                                                                                                        |                                                                                                                                                               |
| McDonald, Fisher, Flanagan, & Honan (2015) | 30 (25)  | 30 (25) | 47.27 (14.64) | 46.37 (13.52) | 13.40 years (13.40)     | Severe (PTA M 51.37 days)       | <i>ToM, emotion recognition</i> TASIT (McDonald et al., 2003)<br><i>Emotional Empathy</i> Balanced Emotional Empathy Scale (BEES; Mehrabian, 2000)                                                                           | <i>Pragmatics (insincerity) (exp.)</i> Identification of (in-)sincerity                                                | ca +<br>Significant correlations between ToM and sensitivity of sincerity                                                                                     |
| McDonald, Fisher, & Flanagan (2016)        | 31 (22)  | 24 (14) | 45.06 (13.61) | 46.08 (12.40) | 15.12 years (10.48)     | Severe (PTA: 32,74 days M)      | <i>ToM, emotion recognition</i> TASIT (McDonald et al., 2003)                                                                                                                                                                | <i>Pragmatics (hints) (exp.)</i> Audiovisual hinting task                                                              | ca -/+<br>Significant correlations between ToM and identification of hints, no correlation between emotion recognition and identification of hints            |
| Milders et al. (2008)                      | 33 (28)  | 34 (30) | 37.5 (16.1)   | 35.6 (13.1)   | 2.1 months (1.8)        | Mild – severe (PTA M 12.5 days) | <i>Emotion Recognition</i> Recognizing facial expressions (Ekman & Friesen, 1976)<br>Florida Affect Battery (FAB: Bowers et al., 1998)<br><i>ToM</i> Faux Pas Test (Stone et al., 1998)<br>Cartoon test (Happé et al., 1999) | <i>Global communication (proxy)</i> Neuropsychology Behavior and Affect Profile (NBAP; Nelson et al., 1998)            | ca- /+<br>Correlation between emotion recognition and proxy-reported global communication, no correlation between ToM and proxy-reported global communication |
| Muller et al. (2010)                       | 15 (13)  | 15 (13) | 37,2 (12.3)   | 37.0 (12.5)   | 102.9 (121.2)           | Severe (GCS: 3-7)               | <i>ToM verbal</i> Faux Pas Test (Stone et al., 1989)<br>First-order false belief task<br>Second-order false belief task (Firth & Corcorn, 1996; Bach et al. 1998; Rowe et al. 2001)                                          | <i>Pragmatics (indirect speech acts)</i> Montreal Protocol for the Evaluation of Communication (Joanette et al., 2004) | ca +<br>significant correlations between (verbal) ToM tests and interpretation of indirect speech acts                                                        |

## Electronic Supplementary Material

| Study (year)                  | Cohort   |         | Age           |               | Time postonset (months)   | TBI severity                   | Subcomponent social cognition measure                                                                                                                                                                                                                                                              | Subcomponent communication measure                                                                                                                              | Statistically significant relationship (yes: +/no: -)                                                                                                                                                         |
|-------------------------------|----------|---------|---------------|---------------|---------------------------|--------------------------------|----------------------------------------------------------------------------------------------------------------------------------------------------------------------------------------------------------------------------------------------------------------------------------------------------|-----------------------------------------------------------------------------------------------------------------------------------------------------------------|---------------------------------------------------------------------------------------------------------------------------------------------------------------------------------------------------------------|
|                               | N (male) |         | M (SD)        |               |                           |                                |                                                                                                                                                                                                                                                                                                    |                                                                                                                                                                 |                                                                                                                                                                                                               |
|                               | EG       | CG      | EG            | CG            |                           |                                |                                                                                                                                                                                                                                                                                                    |                                                                                                                                                                 |                                                                                                                                                                                                               |
|                               |          |         |               |               |                           |                                | <i>nonverbal</i><br>Character intention task<br>Brunet et al. (2000)<br>Reading The Mind in The Eyes Test (Baron-Cohen et al., 2001)                                                                                                                                                               |                                                                                                                                                                 |                                                                                                                                                                                                               |
| Rigon et al. (2018)           | 46 (23)  | 42 (21) | 47.09 (17.07) | 45.74 (14.68) | at least 6 months (6-606) | Moderate – severe (GCS: < 13)  | <i>Emotion Recognition</i><br>Emotion Recognition Test (ERT; Kessels et al., 2014)                                                                                                                                                                                                                 | <i>Global communication (self/proxy)</i><br>La Trobe Communication Questionnaire (LCQ; Douglas et al., 2000)                                                    | ca +<br>Significant negative correlation between emotion recognition and proxy-reported global communication<br>ra +<br>Emotion recognition was a significant predictor of self-reported global communication |
| Saxton, Y-ounan, & Lah (2013) | 24 (18)  | 24 (13) | 41.54 (14.29) | 33.75 (15.67) | 48 (20.04)                | severe (GCS: 8.37; PTA: 28.67) | <i>Emotion Recognition</i><br>Montreal Set of Facial Displays of Emotion (MSFDE; Beaupre, Cheung, & Hess, 2000);<br><i>ToM</i><br>Adapted Stories Task (Bibby & McDonald, 2005)<br>The Eyes Test (Baron-Cohen et al., 2001)<br><i>Empathy</i><br>Interpersonal Reactivity Index (IRI; Davis, 1980) | <i>Global communication (self)</i><br>Key Behaviors Change Inventory (KBCI; Kolitz et al., 2003; Vanderploeg et al., 2007)<br>→ domain “Communication Problems” | ca –/+<br>Significant correlation between empathy and self-reported global communication, no significant correlations between ToM or emotion recognition and self-reported global communication               |
| Watts & Douglas (2006)        | 12 (11)  | 12 (11) | 32.33 (13.89) | 33.08 (13.47) | 16.75 (13,77)             | Severe (PTA ≥ 7 days)          | <i>Emotion Recognition</i><br>TASIT; Part 1: Emotion Evaluation Test                                                                                                                                                                                                                               | <i>Global communication (self/proxy)</i><br>La Trobe Communication Questionnaire (LCQ; Douglas et al., 2000)                                                    | ca +<br>Significant relationship between emotion recognition and global communication (proxy-report)                                                                                                          |

Notes. Ca: correlation analysis; CG: control group; EG: experimental group; GCS: Glasgow Coma Scale; M: Mean; PTA: Posttraumatic Amnesia; ra: regression analysis; SD: standard deviation.
