# Supplementary material for: Emotion Recognition, Empathy, or ToM? The Influence of Social Cognition on Communication in Traumatic Brain Injury
Source: Atypon-hosted journal article supplement (doi:10.1024/1016-264x/a000355), 2022-05-23
Supplement: 1016-264X_a000355_esm4.pdf [file 1016-264X_a000355_esm4.pdf]

# Electronic Supplementary Material

## ESM 4. Overview of studies reporting empirical evidence for/against an association between emotion recognition and subcomponents of communication

| Study (year)               | Sample size | Social cognition measure                                                                                     | Communication measure                                                                                                                                       | Statistical measure                | Results                                                                                                                                                                                 |
|----------------------------|-------------|--------------------------------------------------------------------------------------------------------------|-------------------------------------------------------------------------------------------------------------------------------------------------------------|------------------------------------|-----------------------------------------------------------------------------------------------------------------------------------------------------------------------------------------|
| McDonald et al. (2004)     | 25          | <i>ToM, emotion recognition</i><br>TASIT – Part 1                                                            | <i>Global communication</i><br>Setting<br>Spontaneous videoed interaction<br>Rating of videoed interaction<br>BRISS-R                                       | Correlation (Spearman's <i>r</i> ) | Better emotion recognition (dynamic) – appropriate personal conversation style (e.g., use of humor)                                                                                     |
| McDonald & Flanagan (2004) | 34          | <i>ToM, emotion recognition</i><br>TASIT – Part 1                                                            | <i>Pragmatics (sarcasm)</i><br>TASIT                                                                                                                        | Linear regression analysis         | No significant association between emotion recognition (dynamic) and reception of social inference (i.e., sarcasm)                                                                      |
| McDonald et al. (2015)     | 30          | <i>ToM, emotion recognition</i><br>TASIT – Part 1                                                            | <i>Pragmatics (insincerity) (exp.)</i><br>Identification of insincerity                                                                                     | Regression analysis                | Emotion recognition (dynamic) did not predict sensitivity to sincerity                                                                                                                  |
| McDonald et al. (2016)     | 31          | <i>ToM, emotion recognition</i><br>TASIT – Part 1                                                            | <i>Pragmatics (hints) (exp.)</i><br>Audiovisual hinting task                                                                                                | Correlation (Spearman's <i>r</i> ) | No correlation between emotion recognition (dynamic) and understanding of hints                                                                                                         |
| Milders et al. (2008)      | 33          | <i>Emotion Recognition</i><br>Composite Score<br>Recognizing facial expressions (Ekman & Friesen, 1976), FAB | <i>Global communication (proxy)</i><br>NBAP<br>→ Subscale 'Pragnosia'                                                                                       | Correlation (Spearman's <i>r</i> ) | Poorer emotion recognition abilities (static/auditive) – poorer pragmatic rating (proxy)                                                                                                |
| Rigon et al. (2018)        | 46          | <i>Emotion Recognition</i><br>ERT                                                                            | <i>Global communication (self/proxy)</i><br>LC                                                                                                              | Correlation (Spearman's <i>r</i> ) | Poorer facial emotion recognition (dynamic) – poorer global communication rating (proxy); poorer facial emotion predicts proxy-rating of disinhibition and conversational effectiveness |
| Saxton et al. (2013)       | 24          | <i>Emotion recognition</i><br>Montreal Set of Facial Displays of Emotion                                     | <i>Global communication (self)</i><br>Key Behaviors Change Inventory (KBCI; Koltz et al., 2003; Vanderploeg et al., 2007) → Domain 'Communication Problems' | Simultaneous regression analysis   | no correlations between facial emotion recognition (static) and global communication rating (self)                                                                                      |
| Watts & Douglas (2006)     | 12          | <i>Emotion Recognition</i><br>TASIT – Part 1                                                                 | <i>Global communication (self/proxy)</i><br>LCQ                                                                                                             | Correlation (Spearman's <i>r</i> ) | poorer facial emotion recognition (dynamic) – poorer global communication rating (proxy)                                                                                                |

Note. TASIT: The Awareness of Social Inference Test (McDonald et al., 2003); ERT: Emotion Recognition Test (Kessels et al., 2014); FAB: Florida Affect Battery; BRISS-R: Subscales of Behaviourally Referenced Rating System of Intermediate Social Skills, Revised (Wallander, Conger & Conger, 1985); NBAP: Neuropsychology Behavior and Affect Profile (Nelson et al., 1998); LCQ: La Trobe Communication Questionnaire (Douglas et al., 2000).
