# Supplementary material for: Emotion Recognition, Empathy, or ToM? The Influence of Social Cognition on Communication in Traumatic Brain Injury
Source: Atypon-hosted journal article supplement (doi:10.1024/1016-264x/a000355), 2022-05-23
Supplement: 1016-264x_a000355_esm5.pdf [file 1016-264x_a000355_esm5.pdf]

## Electronic Supplementary Material

ESM 5. Overview of studies reporting empirical evidence against/for an association between empathy and communication subcomponents

| Study (year)           | Sample size | Social cognition measure                                                             | Communication measure                                                                                                                                        | Statistical measure              | Results                                                                                                    |
|------------------------|-------------|--------------------------------------------------------------------------------------|--------------------------------------------------------------------------------------------------------------------------------------------------------------|----------------------------------|------------------------------------------------------------------------------------------------------------|
| McDonald et al. (2015) | 30          | <i>Emotional Empathy</i><br>Balanced Emotional Empathy Scale (BEES; Mehrabian, 2000) | <i>Pragmatics (insincerity) (exp.)</i><br>Identification of insincerity                                                                                      | Regression analysis              | No unique contribution of emotional empathy to sincerity detection                                         |
| Saxton et al. (2013)   | 24          | <i>Empathy</i><br>Interpersonal Reactivity Index (IRI; Davis, 1980)                  | <i>Global communication (self)</i><br>Key Behaviors Change Inventory (KBCI; Kolitz et al., 2003; Vanderploeg et al., 2007) → Domain “Communication Problems” | Simultaneous regression analysis | Lower levels of empathy (i.e., perspective-taking abilities) – higher levels of interpersonal difficulties |
