# Supplementary material for: Emotion Recognition, Empathy, or ToM? The Influence of Social Cognition on Communication in Traumatic Brain Injury
Source: Atypon-hosted journal article supplement (doi:10.1024/1016-264x/a000355), 2022-05-23
Supplement: 1016-264X_a000355_esm6.pdf [file 1016-264X_a000355_esm6.pdf]

# Electronic Supplementary Material

## ESM 6. Overview of studies reporting empirical evidence against/for an association between ToM and communication subcomponents

| Study (year)               | Sample size | Social cognition measure                                                                                                                                                                                 | Communication measure                                                                                                                                                     | Statistical measure                 | Results                                                                                                                                                                                    |
|----------------------------|-------------|----------------------------------------------------------------------------------------------------------------------------------------------------------------------------------------------------------|---------------------------------------------------------------------------------------------------------------------------------------------------------------------------|-------------------------------------|--------------------------------------------------------------------------------------------------------------------------------------------------------------------------------------------|
| Bosco et al. (2017; 2018)  | 35          | Composite Score:<br><i>First-order ToM</i><br>Smarties Task (Perner et al., 1989); Sally-Anne Task (Baron-Cohen et al., 1985)<br><i>Second-order ToM</i><br>Selection of 6 Strange Stories (Happé, 1994) | <i>Pragmatics (indirect speech acts, irony, deceit)</i><br>ABaCo                                                                                                          | Hierarchical regression analysis    | Better ToM – better linguistic comprehension of deceit, better extralinguistic comprehension of deceit, better extralinguistic production of deceit, better linguistic production of irony |
| Byom & Turkstra (2012)     | 5           | <i>ToM (exp.)</i><br>Manipulated version of RCIT in terms of ToM demands (intimacy)<br>→ Analysis of MST                                                                                                 | <i>Discourse production</i><br>RCIT                                                                                                                                       | Wilcoxon signed rank test           | Less adequate adjustment to increase of intimacy level in conversation than control group in terms of production of MST                                                                    |
| Byom & Turkstra (2017)     | 21          | <i>ToM (exp.)</i><br>Manipulated version of discourse task (high ToM demands)<br>→ view of a fictional character holding the opposite opinion<br>→ analysis of MST                                       | <i>Discourse production (exp.)</i><br>→ production of MST in discussion of controversial topics (e.g., animal testing)<br>→ rating of social communication (naive raters) | Correlation (Spearman's <i>r</i> )  | More mental state words – more socially acceptable communication                                                                                                                           |
| Channon et al. (2005)      | 19          | <i>ToM (exp.)</i><br>Action Comprehension Task                                                                                                                                                           | <i>Pragmatics (sarcasm; exp.)</i><br>Sarcasm Comprehension Task                                                                                                           | Pearson product moment correlations | Better ToM – better sarcasm comprehension                                                                                                                                                  |
| Honan et al. (2015)        | 25          | <i>ToM (exp.)</i><br>High-ToM-condition of discourse task                                                                                                                                                | <i>Discourse comprehension (exp.)</i><br>Comprehension of everyday conversations                                                                                          | Regression analysis                 | No significant influence of ToM on comprehension of everyday conversations                                                                                                                 |
| Martin & McDonald (2005)   | 16          | <i>ToM (exp.)</i><br>Mental Inference Stories (Bibby & McDonald, 2005)                                                                                                                                   | <i>Pragmatics (irony; exp.)</i><br>Pragmatic Interpretation Stories                                                                                                       | Correlation (Spearman's <i>r</i> )  | No significant association of ToM and irony comprehension                                                                                                                                  |
| McDonald & Flanagan (2004) | 34          | <i>ToM, emotion recognition</i><br>TASIT – Subtest 2 & 3                                                                                                                                                 | <i>Pragmatics (sarcasm)</i><br>TASIT                                                                                                                                      | Linear regression analysis          | Better second-order ToM – better ability to understand social conversational inferences                                                                                                    |
| McDonald et al. (2004)     | 21          | <i>ToM, emotion recognition</i><br>TASIT – Part 2 & 3                                                                                                                                                    | <i>Global communication</i><br>BRIS-R for video-recording of spontaneous interaction                                                                                      | Correlation (Spearman's <i>r</i> )  | Better ToM – appropriate personal conversation style (e.g., use of humor)                                                                                                                  |
| McDonald et al. (2014)     | 25          | <i>ToM</i><br>High-ToM-condition of naturalistic speech production task (Exp.)                                                                                                                           | <i>Discourse production (exp.)</i><br>Naturalistic speech production task<br>→ analysis of number and adequacy of correct                                                 | Regression analysis                 | Influence of ToM on discourse production with high demand on inhibitory control                                                                                                            |

# Electronic Supplementary Material

| Study (year)           | Sample size | Social cognition measure                                                                                                                                                                                                                        | Communication measure                                                                                                                                        | Statistical measure                | Results                                                                                   |
|------------------------|-------------|-------------------------------------------------------------------------------------------------------------------------------------------------------------------------------------------------------------------------------------------------|--------------------------------------------------------------------------------------------------------------------------------------------------------------|------------------------------------|-------------------------------------------------------------------------------------------|
|                        |             |                                                                                                                                                                                                                                                 | details in picture description/ association tasks                                                                                                            |                                    |                                                                                           |
| McDonald et al. (2015) | 31          | <i>ToM, emotion recognition</i><br>TASIT – Part 2 & 3                                                                                                                                                                                           | <i>Pragmatics (insincerity; exp.)</i><br>Identification of insincerity                                                                                       | Correlation (Spearman's <i>r</i> ) | Better ToM – better detection of insincerity                                              |
| McDonald et al. (2016) | 30          | <i>ToM emotion recognition</i><br>TASIT – Part 2 & 3                                                                                                                                                                                            | <i>Pragmatics (hints; exp.)</i><br>Audiovisual hinting task                                                                                                  | Correlation (Spearman's <i>r</i> ) | Better ToM – better understanding of hints                                                |
| Milders et al. (2008)  | 33          | <i>ToM</i><br>Faux Pas Test (Stone et al., 1998); Cartoon test (Happé et al., 1999)                                                                                                                                                             | <i>Global communication (proxy)</i><br>NBAP                                                                                                                  | Correlation (Spearman's <i>r</i> ) | No correlation between ToM and proxy rating of social behavior (incl. pragmatic behavior) |
| Muller et al. (2010)   | 15          | <i>ToM verbal</i><br>Faux Pas Test; First-order false belief & second-order false belief task (Exp.)<br><i>ToM nonverbal</i><br>Character intention task (Brunet et al., 2000);<br>Reading The Mind in The Eyes Test (Baron-Cohen et al., 2001) | <i>Pragmatics (indirect speech acts)</i><br>MEC                                                                                                              | Correlation (Spearman's <i>r</i> ) | Better ToM (verbal tasks) – better understanding of indirect speech acts                  |
| Saxton et al. (2013)   | 24          | <i>ToM</i><br>Adapted Stories Task (Bibby & McDonald, 2005)<br>The Eyes Test (Baron-Cohen et al., 2001)                                                                                                                                         | <i>Global communication (self)</i><br>Key Behaviors Change Inventory (KBCI; Kolitz et al., 2003; Vanderploeg et al., 2007) → Domain "Communication Problems" | Simultaneous regression analysis   | No correlations between TOM and global communication rating (self)                        |

*Note.* ToM: Theory of Mind; MST: mental state term; TASIT: The Awareness of Social Inference Test (McDonald et al., 2003); ABaCo: Assessment Battery of Communication (Angeleri et al., 2012); RCIT: Relationship Closeness Induction Task (Sedikides, Campbell et al., 1998); BRISS-R: Behavioural Referenced Rating System of Intermediate Social Skills, Revised (Wallander et al., 1985); NBAP: Neuropsychology Behavior and Affect Profile (Nelson et al., 1998); MEC: Montreal Protocol for the Evaluation of Communication (Joanette et al., 2004).
